# Supplementary material for: Scorpion Peptide Smp24 Exhibits a Potent Antitumor Effect on Human Lung Cancer Cells by Damaging the Membrane and Cytoskeleton In Vivo and In Vitro
Source: MDPI journal article supplement (doi:10.3390/toxins14070438), 2022-06-28
Supplement: s1 [file s1]

# Supplementary Materials: Scorpion Peptide Smp24 Exhibits a Potent Antitumor Effect on Human Lung Cancer Cells by Damaging the Membrane and Cytoskeleton In Vivo and In Vitro

Ruiyin Guo, Junfang Liu, Jinwei Chai, Yahua Gao, Mohamed A. Abdel-Rahman and Xueqing Xu

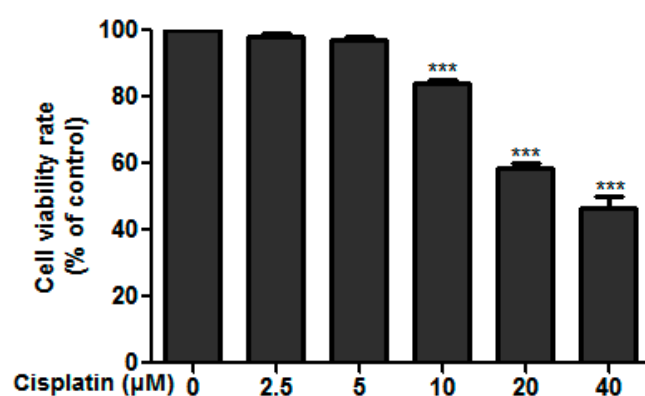

Figure S1. Viability of A549 cells treated with cisplatin for 24 h.

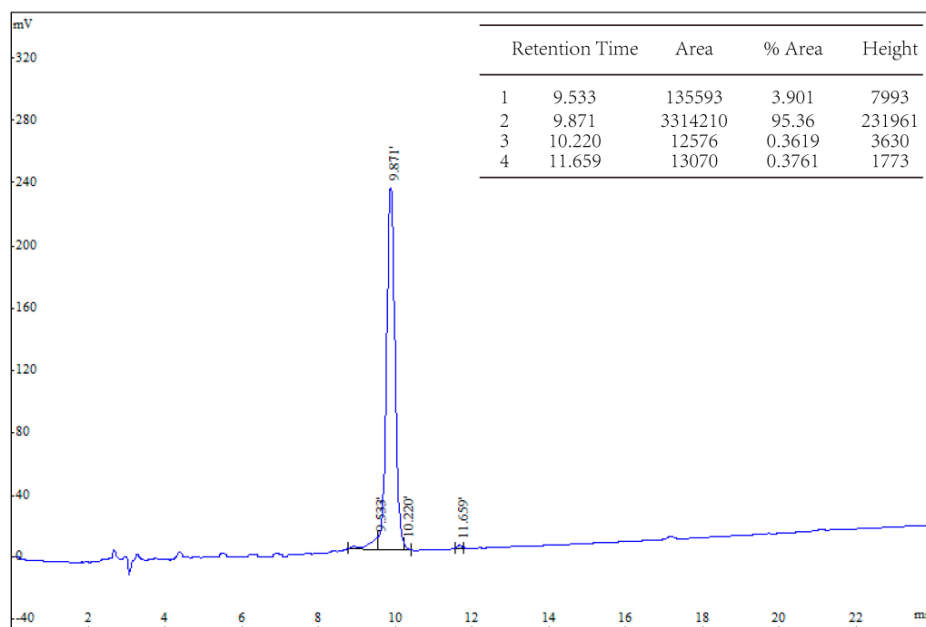

Figure S2. RP-HPLC purification of Smp24.

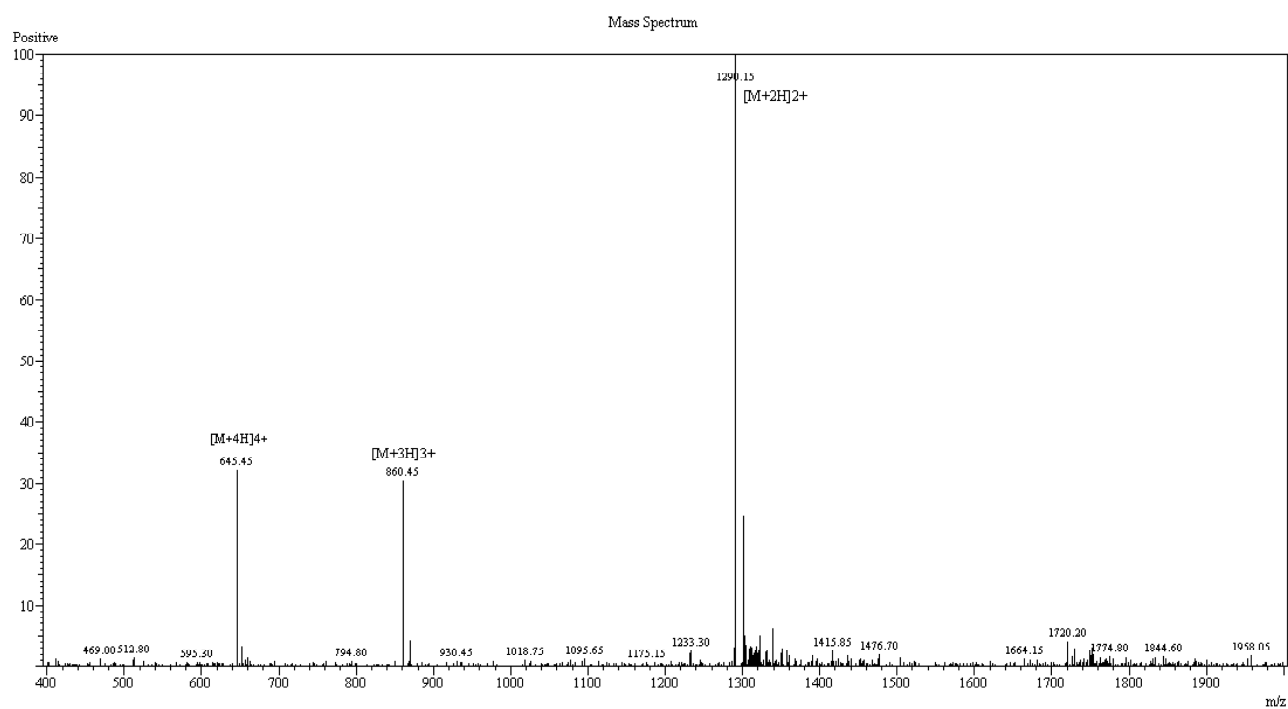

Figure S3. MALDI-TOF-MS identification of Smp24.

**Table S1.** IC<sub>50</sub> values and selectivity index of cancer cell lines treated with Smp24 for 24 h.

|       | IC <sub>50</sub> (μM) | Selectivity Index |
|-------|-----------------------|-------------------|
| A549  | 4.06 ± 0.60           | 3.61              |
| H3122 | 4.64 ± 0.18           | 3.16              |
| PC-9  | 6.34 ± 0.53           | 2.32              |
| H460  | 7.07 ± 0.81           | 2.07              |
| MRC-5 | 14.68 ± 0.79          | -                 |
